# Supplementary material for: Design of a humidity-resistant triboelectric nanogenerator based on a CAU-10-(SO3H)0.08(OH)0.92/PVC composite film for producing hydrogen via water electrolysis application
Source: Royal Society of Chemistry journal article supplement (doi:10.1039/d5tc00018a), 2025-01-01
Supplement: d5tc00018a1.pdf [file d5tc00018a1.pdf]

## Supplementary Information

### **Design of humidity-resistant triboelectric nanogenerator based on CAU-10-(SO<sub>3</sub>H)<sub>0.08</sub>(OH)<sub>0.92</sub>/PVC composites for producing hydrogen by water electrolysis application**

*Junhui Wu<sup>a,b</sup>, Baoping Yang<sup>a,\*</sup>, Jiahao Zhou<sup>b</sup>, Yuan Ye<sup>b</sup>, Ming Zhong<sup>b</sup>, Yong Ding<sup>d</sup>, Kun Zhao<sup>b,c,\*</sup>*

<sup>a</sup> School of Petrochemical Technology, Lanzhou University of Technology, Lanzhou, Gansu, 730050, China

<sup>b</sup> State Key Laboratory of Advanced Processing and Recycling of Non-ferrous Metals, Lanzhou University of Technology, Lanzhou, Gansu, 730050, China

<sup>c</sup> Department of Chemistry, Tsinghua University, Beijing 100084, China

<sup>d</sup> School of Engineering, Qinghai Institute of Technology, Xining, Qinghai, 810016, China

\*E-mail: zhaokun@lut.edu.cn, yangbaoping2004@163.com

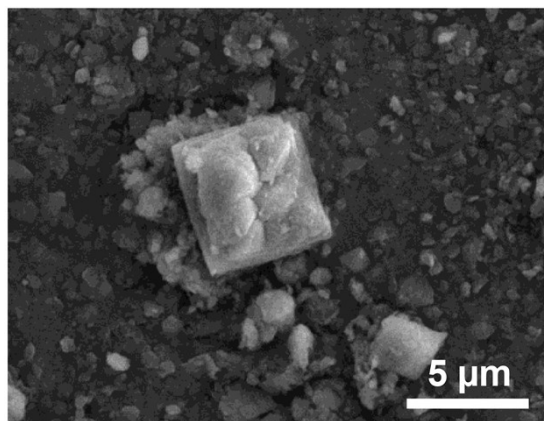

**Fig. S1** SEM image of the prepared CAU-10-(SO<sub>3</sub>H)<sub>0.08</sub>(OH)<sub>0.92</sub> particles at magnifications of 3,000x.

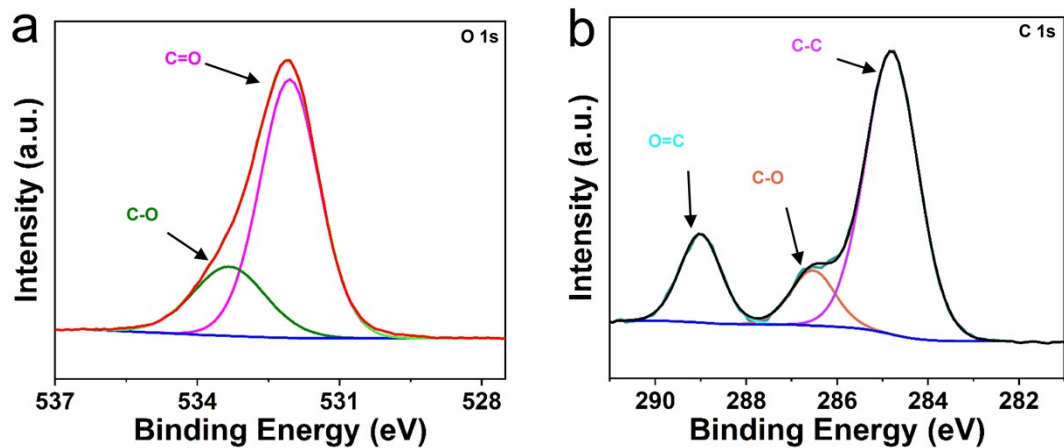

**Fig. S2** High-resolution O 1s (a) and C 1s (b) XPS spectra of the prepared CAU-10-(SO<sub>3</sub>H)<sub>0.08</sub>(OH)<sub>0.92</sub> particles.

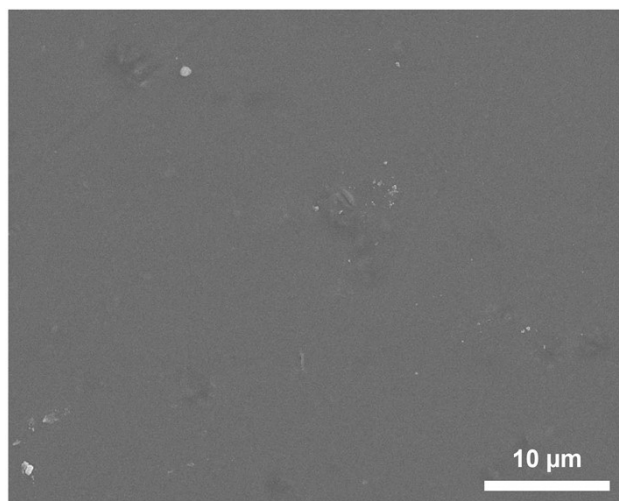

**Fig. S3** SEM image of the CAU-10-  $(\text{SO}_3\text{H})_{0.08}(\text{OH})_{0.92}$ /PVC composite film.

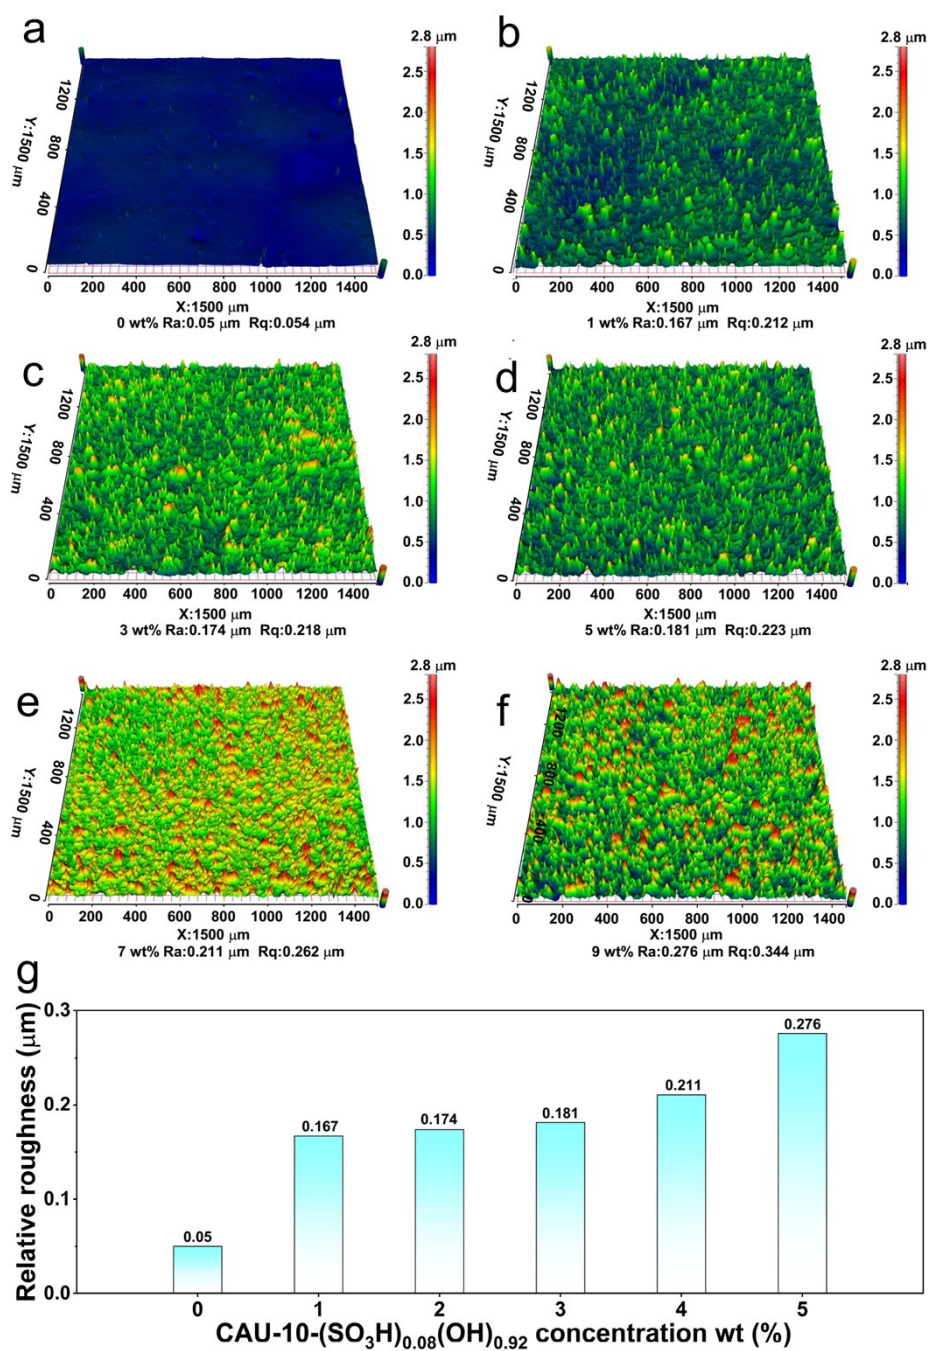

**Fig. S4 (a-f)** 3D surface morphologies of the CAU-10- (SO<sub>3</sub>H)<sub>0.08</sub>(OH)<sub>0.92</sub>/PVC composite films at CAU-10- (SO<sub>3</sub>H)<sub>0.08</sub>(OH)<sub>0.92</sub> concentrations of 0 (a), 1 (b), 3 (c), 5 (d), 7 (e) and 9 wt% (f). **(g)** Histogram of surface relative roughness of CAU-10-(SO<sub>3</sub>H)<sub>0.08</sub>(OH)<sub>0.92</sub>/PVC composite films at different CAU-10- (SO<sub>3</sub>H)<sub>0.08</sub>(OH)<sub>0.92</sub> concentrations.

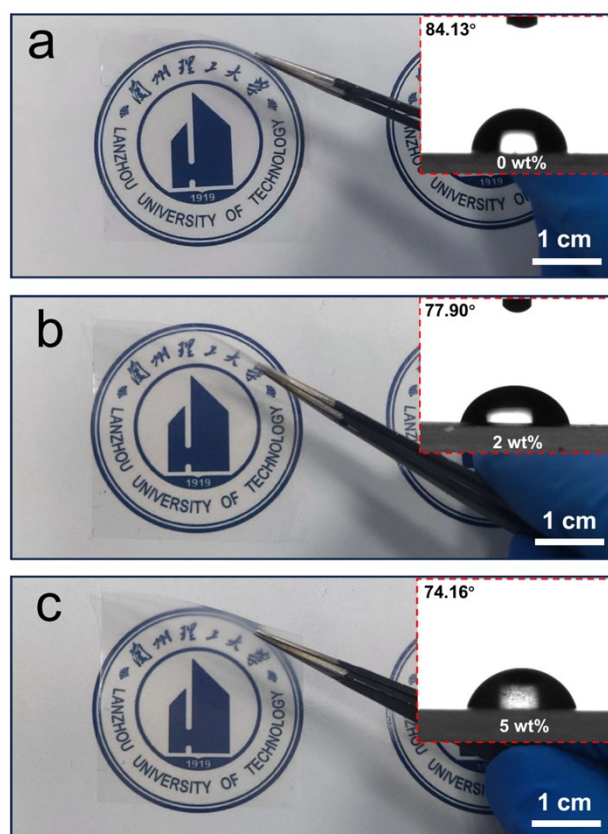

**Fig. S5** Physical photographs of composite films under CAU-10-(SO<sub>3</sub>H)<sub>0.08</sub>(OH)<sub>0.92</sub> concentration of 0 (a), 2 (b) and 5 wt% (c), the insets are corresponding images of water droplets on the films.

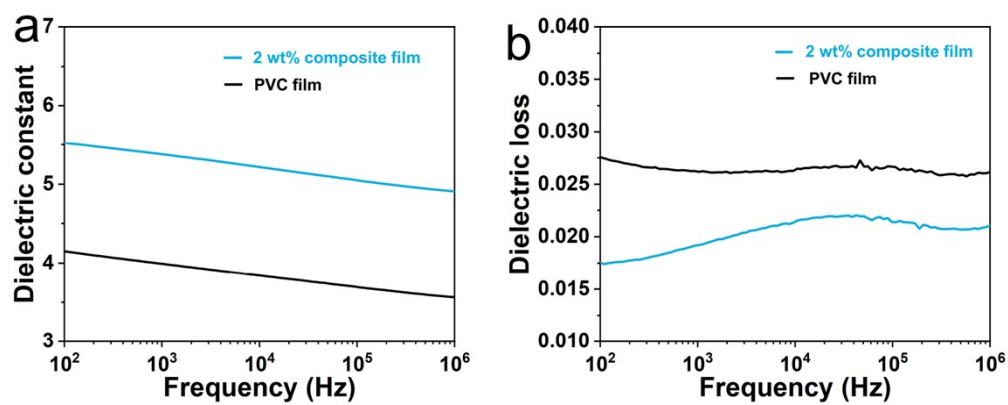

**Fig. S6** Dielectric constant (a) and dielectric loss (b) of pure PVC film and 2 wt% CAU-10-(SO<sub>3</sub>H)<sub>0.08</sub>(OH)<sub>0.92</sub>/PVC composite film.

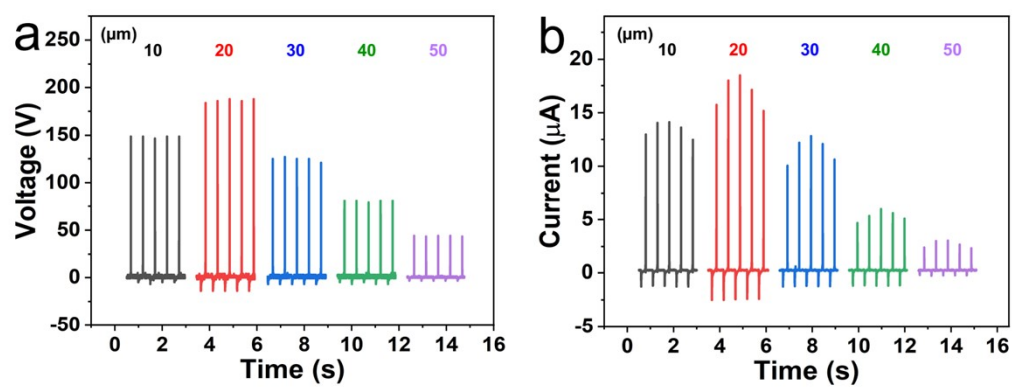

**Fig. S7** Measured  $V_{oc}$  (a) and  $I_{sc}$  (b) of the TENG at different thickness of pure PVC films.



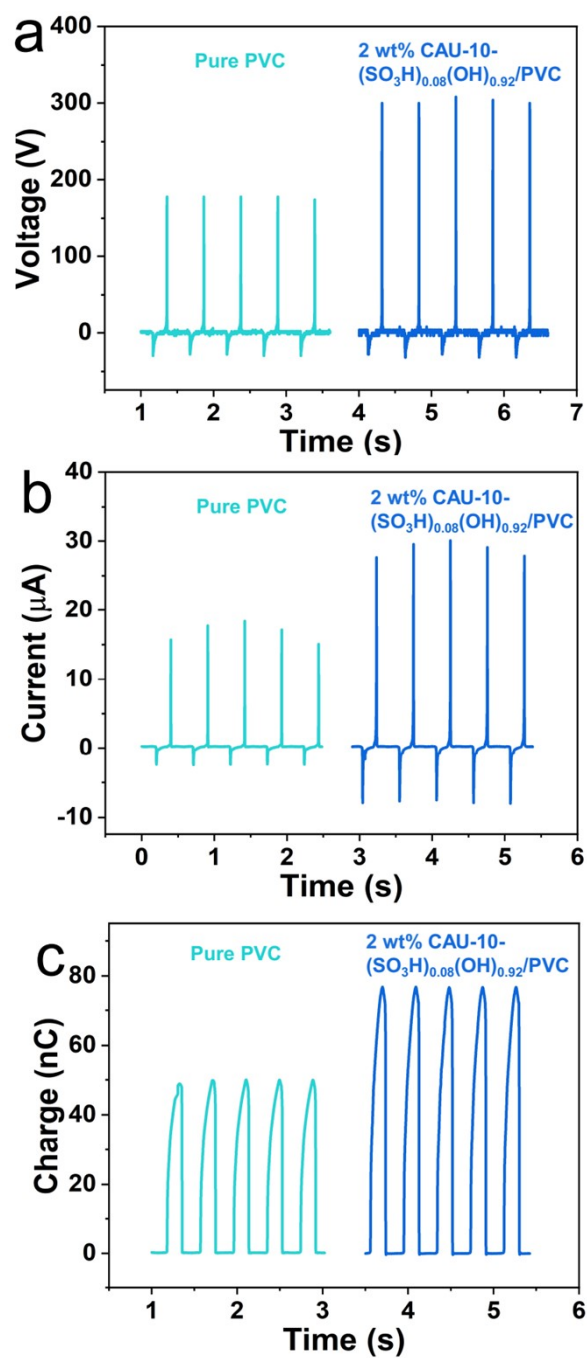

**Fig. S8** Comparison of the measured  $V_{oc}$  (a),  $I_{sc}$  (b) and  $Q_{sc}$  (c) signals of the pure PVC-based TENG and the 2 wt% CAU-10-(SO<sub>3</sub>H)<sub>0.08</sub>(OH)<sub>0.92</sub>/PVC-based TENG.

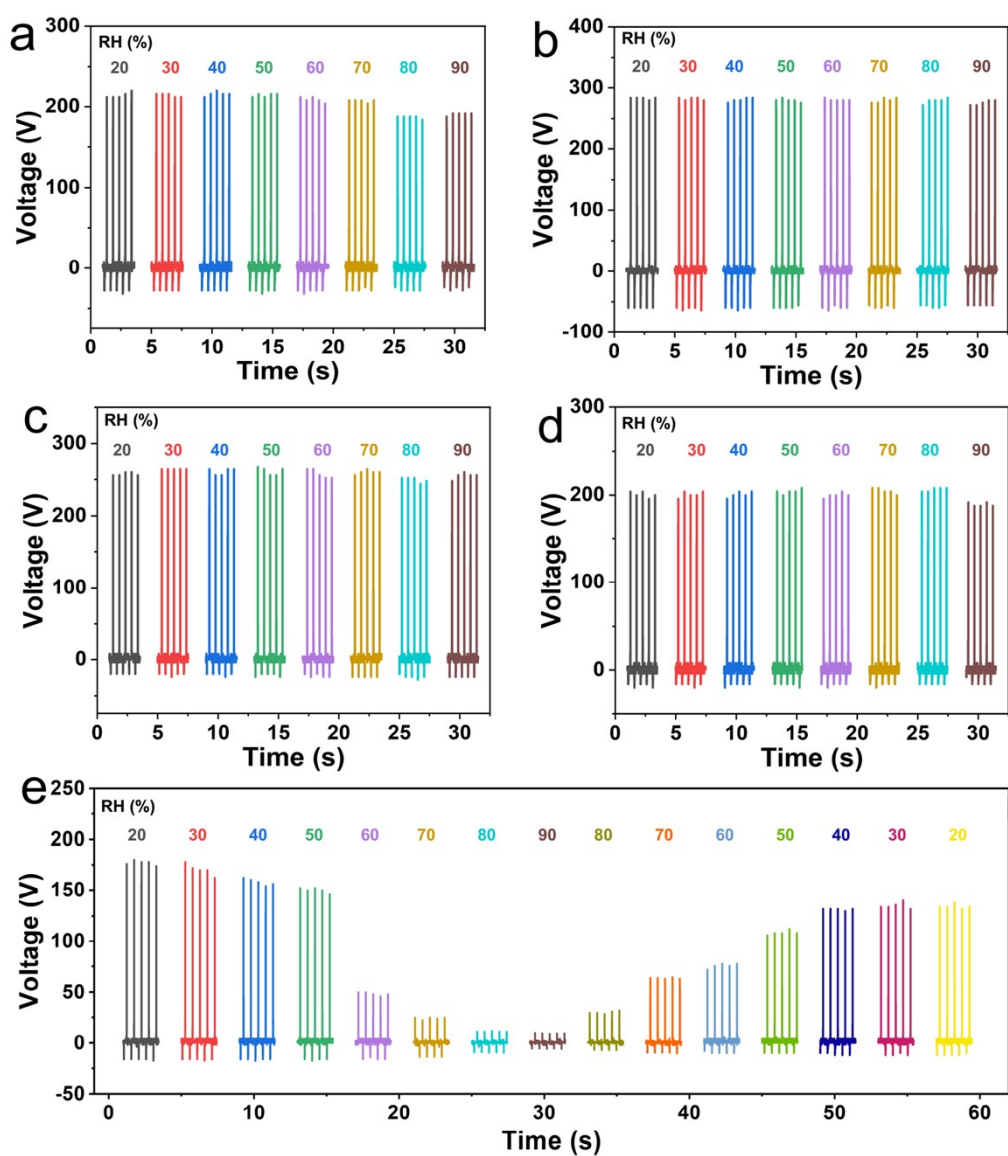

**Fig. S9** (a-d) Measured  $V_{oc}$  signals of the TENG based on composite films with CAU-10- $(SO_3H)_{0.08}(OH)_{0.92}$  concentrations of 1 (a), 3 (b), 4 (c), and 5 wt% (d) at varying RH levels. (e) Measured  $V_{oc}$  signals of the pure PVC film-based TENG when RH first increases and then decreases.

**Table S1** Comparison of output performance in MOF-based moisture-resistant TENGs.

| Triboelectric materials                                                                                | Size (cm) | Voltage/<br>Current | 20-80 RH%<br>voltage<br>variation | Lifetime/<br>cycles | Ref.         |
|--------------------------------------------------------------------------------------------------------|-----------|---------------------|-----------------------------------|---------------------|--------------|
| CAU-10-<br>(SO <sub>3</sub> H) <sub>0.08</sub> (OH) <sub>0.92</sub> -PVC<br>composite film and Al foil | 6 × 6     | 318 V/<br>30 μA     | stable                            | 36,000              | This<br>work |
| MOF-525/MXene/<br>Ecoflex composite film and<br>latex gloves                                           | 3 × 3     | 2080 V/<br>126 μA   | decrease<br>~11.3 %               | 20,000              | 30           |
| ZIF-8-PAN (ZIF-67-PAN)<br>composite film and PAN                                                       | 2 × 2     | 100 V/<br>1.3 μA    | decrease<br>~72.2 %               | 15,000              | 55           |
| ZIF8/ZIF67 composite film<br>and Teflon                                                                | 2.5 × 2.5 | 359 V/<br>11.7 μA   | decrease<br>~69.1 %               | 10,080              | 56           |
| Co-NPC/PVDF composite<br>film and nylon-11                                                             | 2.5 × 2.5 | 710 V/<br>131.9 μA  | decrease<br>~23.9 %               | 60,000              | 57           |

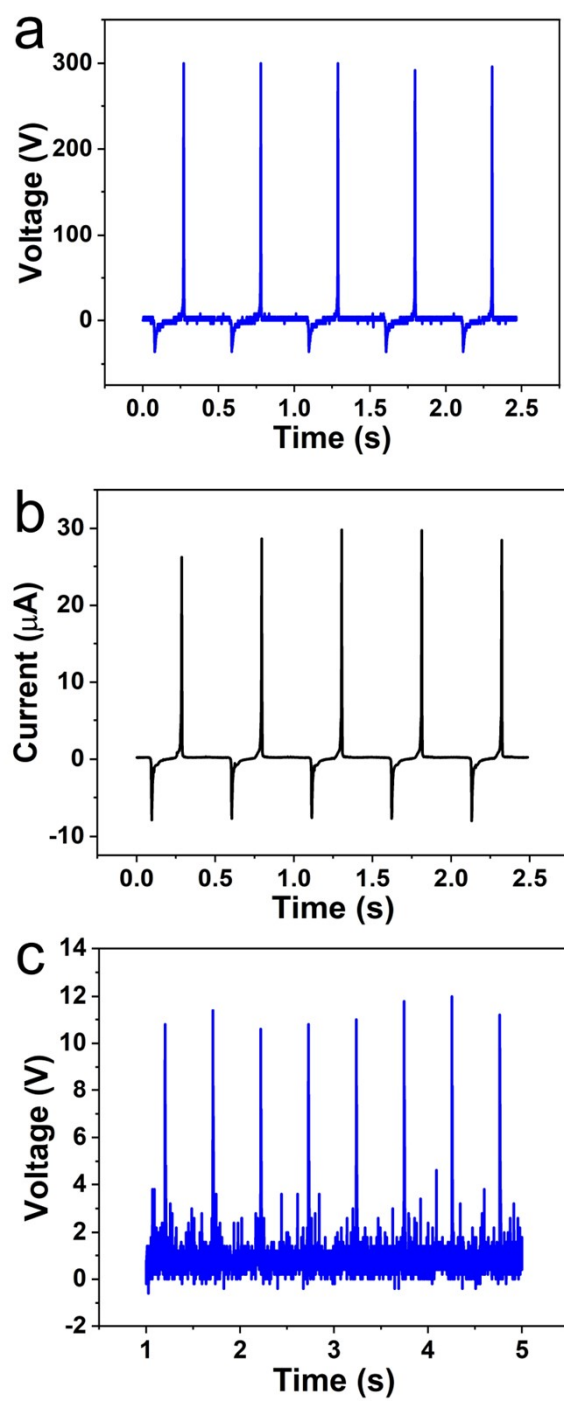

**Fig. S10** (a,b) Measured  $V_{oc}$  (a) and  $I_{sc}$  (b) signals of the 2 wt% CAU-10-( $SO_3H$ )<sub>0.08</sub>(OH)<sub>0.92</sub>/PVC film-based TENG without a transformer and a rectifier. (c) Measured  $V_{oc}$  signals of the 2 wt% CAU-10-( $SO_3H$ )<sub>0.08</sub>(OH)<sub>0.92</sub>/PVC film-based TENG with a transformer and a rectifier.

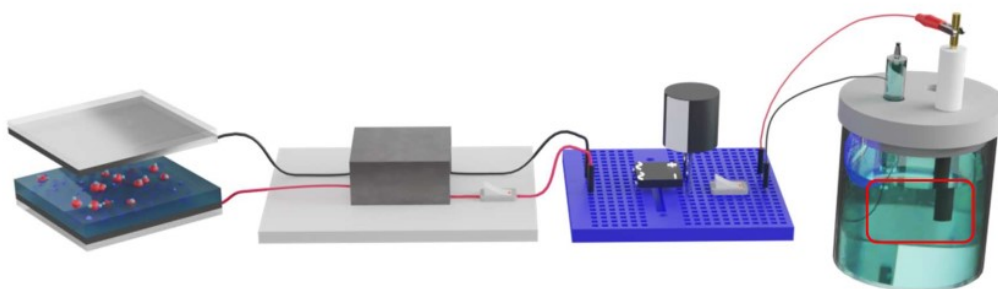

**Fig. S11** (a) Schematic diagram of water electrolysis system based on the TENG.

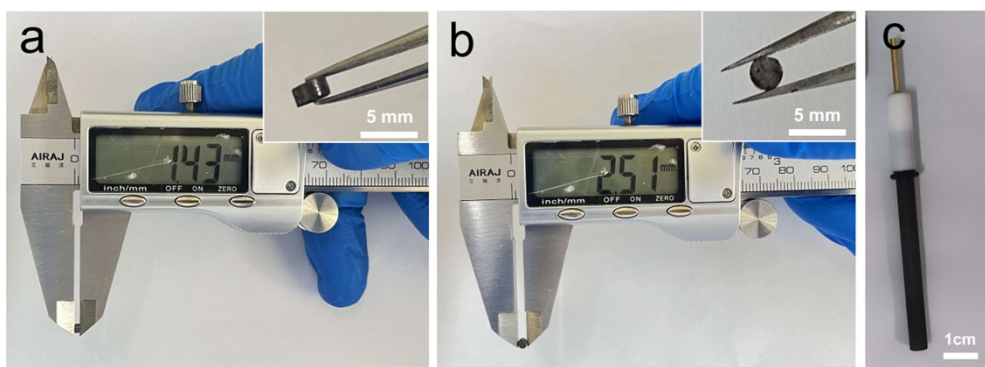

**Fig. S12** Photographs of the height (a) and diameter (b) of carbon rod cathode. The corresponding insets are enlarged photos. (c) Photograph of graphite electrode.

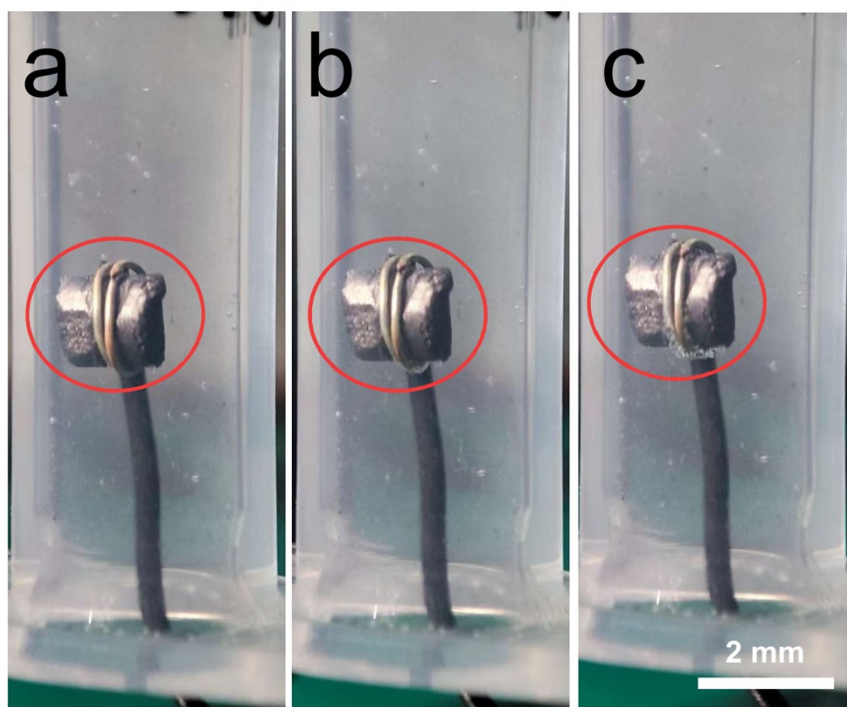

**Fig. S13.** Photographs of the bubbles produced on the cathode surface during the electrolysis of water with a charged capacitor at voltages of 2.3 (a), 2.5 (b) and 2.7 V (c).
